# Supplementary material for: Chemical Characterization of Honeysuckle Polyphenols and Their Alleviating Function on Ultraviolet B-Damaged HaCaT Cells by Modulating the Nrf2/NF-κB Signaling Pathways
Source: MDPI journal article supplement (doi:10.3390/antiox13030294), 2024-02-28
Supplement: s1 [file s1]

## Supplementary Material

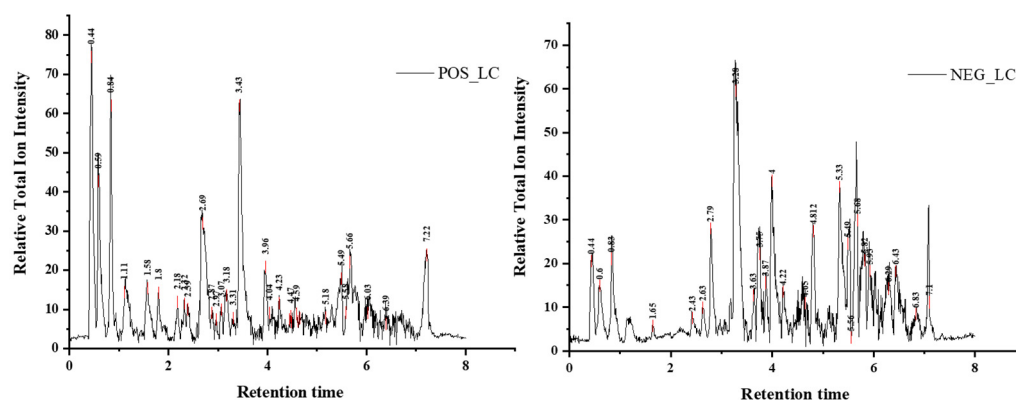

**Figure S1.** Total ion chromatogram of honeysuckle polyphenols (HPs) by LC-MS/MS in positive and negative ion modes, with the horizontal coordinate indicating the retention time of the peaks and the vertical coordinate indicating the relative total ion intensity.
